# Supplementary material for: “That Was Pretty Powerful”: a Qualitative Study of What Physicians Learn When Preparing for Their Maintenance-of-Certification Exams
Source: Springer Nature journal article supplement (doi:10.1007/s11606-019-05118-z), 2019-07-03
Supplement: MOESM1 [file 16878974]

**APPENDIX**

| **Section** | **Title** | **Page** |
| --- | --- | --- |
| 1. | Physicians’ reflections on the value of Maintenance of Certification | 2 |
| 2. | Reasons for participating | 3 |
| 3. | Interview guide | 4-7 |
| 4. | Recruitment protocol, including aTable 1, showing sampling frame | 8 |
| 5. | Selected quotes from physician interviewees about how knowledge acquired when preparing for an MOC exam benefited their patient care, including: | 9-32 |
|  | - aTable 2 (quotes organized by physician) | 9-20 |
|  | - aTable 3 (quotes organized by theme) | 21-32 |

**Section 1: Physicians’ reflections on the value of Maintenance of Certification**

This section presents a selection of quotes from interviewees about their views on Maintenance of Certification (MOC) exams, or MOC programs overall. As described in the paper, we did not ask interviewees about their opinions regarding the value of MOC exams or MOC in general. Some raised these topics, either in the course of answering other questions in the interview guide or in answering the closing question (asked if time allowed) about why the physician chose to participate in the project.

***a. Negative critiques of MOC***

As described above, some voiced concerns about the lack of relevance of exam content. Some went further, critically analyzing the MOC exam requirement itself. These critiques could focus on the physical demands of the test-taking experience itself; for example: “[I]t was extremely time consuming, stressful, expensive to take the exam. [It’s] just kind of a relief to have it over.” (74 ABIM) Another interviewee focused on the physical environment of the secure testing center: “[T]he whole test, it's just… you’re in this room that is like a prison…. they fingerprint you, there's no windows -- It's just a scary exam, you know, and you have no idea how you did, forget it.” (46 ABIM)

Some questioned whether MOC exams assessed physicians’ knowledge and ability, versus simple memorization and test-taking skills: “My job is to know what I know… and when I don’t know, then I get it to someone who knows.... Do I have to [to know the correct answers to MOC exam questions]? That determines whether I’m a good doc or not? No.” (64 ABIM) Another interviewee echoed this theme: “[I]f you’re just a good test-taker you’re going to probably score better. It doesn’t mean you’re actually a better doctor, it just mean you can take tests really well.” (14 ABFM) Others critiqued the use of board certification status by employers and payers: “[T]hey make such a big deal of it, if you don’t pass the exam then that means you are not a good doctor…. [T]here is so much pressure about this exam to the point of, if you don’t pass, you don’t have a job.” (31 ABFM)

Other papers from this study will analyze physicians’ descriptions of the time demanded for exam preparation and the challenge of integrating time for preparation with practice and personal life.

***b. Positive critiques of MOC***

Positive critiques or appreciative analyses of MOC were volunteered less frequently. Some physicians, including two who played a role in defining credentialing policies—one for a hospital, one for an insurance network—connected their own MOC exam experience and their standards-setting work, and said they saw particular value in MOC exams for this reason. One said,

“I was president of our hospital medical staff, and we decided to make board certification a requirement... I took a lot of crap for it, because… we had a bunch of [physicians] who couldn’t pass their recertification, and they actually had to resign from the hospital. So, it was a really big deal in our community, but… I think board certification, whatever the negatives are, ultimately, you’ve got to sit down by yourself and meet a standard, and I don’t think there is any other way to do that.”(47 ABIM)

Another physician, who helped administer a health plan, said, “[T]o me, if I could, I would use board certification as a primary criteria that would exclude some clinicians from our network.” (35 ABIM)

One physician who worked part-time in a clinic in the Caribbean quoted his non-US physician peers as saying they envied the incentive that MOC exams provide for deeper studying: “[T]hey've told me, ‘I wish we had something like [MOC]’… I'll complain to them, ‘I’ve got to take my boards next month, it's such a drag, blah blah blah’ – and they'll say, ‘I wish we had that here… [O]nce we get out of residency, that's it.’” (43 ABIM)

**Section 2: Reasons for participating**

This section presents a selection of quotes from answers to a question asked at the end of the interview where time allowed, about why physicians opted to participate in the study. We present selected examples of how participants answered this question, with our analysis, in order to provide additional information on interviewees’ overall perspectives on MOC that emerged in many of these answers, as well as to provide additional information about the nature of the physicians in our sample. It is possible that future research could compare these physicians’ attitudes against larger surveys to help assess ways in which our interviewees are similar to or different from the larger population of physicians they represent.

1. ***Engagement with larger debates***

Overall, interviewees expressed a common interest in wanting their personal experience to be heard the boards, and possibly integrated into future changes to ABIM’s or ABFM’s MOC programs. These comments were explicitly or implicitly grounded in the same debates over MOC exams and board certification as a whole cited in the Introduction to this paper – physicians’ answers to the question of why they chose to participate indicated an awareness of these debates and an interest in taking the opportunity to participate directly. One put it: “I feel like if people participate in these kinds of things, that’s the direction to try to get productive change… I was happy to participate just because I felt that it was an opportunity to go a little deeper [than the standard post-exam survey], let people know what we think.” (17 ABFM) Another said, “[F]rankly, [I participated] because I think this is an important issue… I just thought, ‘I just did [my MOC exam] – if they are studying it to try and make it better… [I] have to participate.” (47 ABIM) A third physician echoed this sentiment: “I think it’s a worthwhile thing for you guys to get feedback, especially with all the debate that’s going on about what the right thing to do is in this regard.” (52 ABIM)

1. ***Sharing positive perspectives***

Aligning somewhat with the theme of engaging directly with debates over MOC was a theme raised by some interviewees: wanting to share perspectives that appreciated at least some aspects of MOC. As one put it, “I was curious as to what you guys would want to know and if there’s any way that things might be able to be improved. Although it’s not a bad process… Overall I’m not sure if there’s a way to improve it other than just keeping doctors studying more in between…” (73 ABFM) Another said, “[I]t’s… about value. We have so many people who say, ‘I’m not going to do [MOC] anymore.’ So, docs want to do the right thing…. So we have to get back to showing them value… [R]eally the whole intent, the board exam, is very valid. It’s good. I’ll take the test again. I mean, because there is value… I just want it to be closer [to what I do in practice].” (53 ABIM)

1. ***Sharing critical perspectives***

By contrast, some other participants framed their participation in terms of wanting their critiques of the boards to be heard. One said, “I wanted to participate in the process, putting my two cents worth for saying somehow, ‘Don’t make it too hard on us.’” (68 ABIM) Some explicitly or implicitly referred to great ambivalence about whether certification boards serve as a force for self-regulation of the profession of medicine or, as this interviewee paints it, a hostile bureaucracy:“[T]here’s such an industry, you know, the exams and reviews, the boards, the books, the study preps… [T]here’s a whole industry that has nothing to do with seeing patients, taking care of patients, but it all adds to the cost of medicine, directly or indirectly, and that just aggravates me. But… nothing I can do about that…. If my comments make it a little more realistic then that’s fine.” (72 ABFM) A third physician summarized why being critical of MOC motivated them to participate: “I was hoping… that it would change how this test is.” (26 ABFM)

**Section 3: Interview guide**

This section exhibits the interview guide used in the study, which includes 6 sections:

1. Introduction and Purpose
2. Background
3. Exam preparation: what physician did to prepare
4. Exam preparation: impact on life of what physician did to prepare
5. Impact of preparation on physician’s clinical knowledge
6. Impact of preparation on practice
7. **INTRODUCTION AND PURPOSE**

Hello, my name is ___. I am a researcher with the [American Board of Internal Medicine / American Board of Family Medicine].

[If co-interviewer is present: With me on the call today is my colleague ___. (pause for co-interviewer to introduce self)]

We appreciate your taking the time today to help us with our research on how physicians prepare for the [ABFM or ABIM] MOC exam. We’d like to ask you some questions about what you did to prepare for the exam you took recently. We’d like to ask that you be open and candid – there are no right or wrong answers, and we will keep your personal information completely confidential. Nothing you say will affect your standing with the Board in any way. We are only interested in learning about your experience around the exam.

If we ever publish or present anything from this study, we will not include your name or any information that could identify you in any way.

[verify date of most recent MOC examination]

[Review oral consent]

Here’s how the interview process will work:

The conversation should take about 45-60 minutes. [If co-interviewer is present, introduce and clarify that their role is to take notes and ask additional follow-up questions if necessary] We’d like to record the conversation in case we need to go back and check our notes – do we have your permission to record?

[confirm consent to record audio]

Do you have any questions before we get started?

1. **BACKGROUND**
2. First, before we ask about the exam, we just want to get a little background information about the scope of your practice. How would you describe your practice?

*Probe for:*

- What kinds of patients do you tend to see, and what is your relationship with them?
- How would you describe your scope of practice (full-spectrum; cradle to grave; etc.)?
- Does your practice focus on any particular type(s) of condition/patient?

1. **EXAM PREP: WHAT PHYSICIAN DID TO PREPARE**

Now, thinking about the MOC exam you took most recently…

1. What did you do to prepare for the exam?

*Probe for:*

- - How did you choose this approach?
  - How did your process of preparing for the exam compare with what you normally do to stay up to date?

1. Did you use any specific materials to prepare? If so, what were they and how did you use them?

*Probe for:*

- - How did you select the materials you used?
  - Did you use anything from [ABIM/ABFM] itself – the exam blueprint, or any other materials? If so, what/how?
  - Did you use any non-Board materials? (e.g., exam review guides, online modules, other web resources, etc.)

1. Did you attend any exam-preparation courses? If so, what were they, and what information did they cover?

*Probe for:*

- How did you select this course / these courses?
- Extent to which course focused on exam strategy vs/ medical knowledge

1. Did you prepare with other physicians? If so, what did you do, and who with? (no specific names, just general roles)

*Probe for:*

- Relationship (i.e. how found the group)

1. Did you focus on any particular topic areas / information? If so, what were they, and why?

*Probe for:*

- General topic areas
- Specific information
- Information specific to clinical work or subspecialty area vs/ “cross content”

*For each topic mentioned, probe for:*

- How did you decide to focus on this area / these areas?

1. How much time did you spend to prepare?

*Probe for:*

- How long before the exam date did you start to prepare? (and why?)
- How much total time did you spend? (approximately)

1. How did you actually organize your time --when and under what conditions did you prepare? (in the office, at home, etc.)

*Probe for:*

- How did you structure the time? (e.g., x amount per week for a defined period / y amount in a specific course / etc.)
- What would you have otherwise done with the time? (patient care, family, “drive time”, etc)

1. **EXAM PREP: IMPACT ON LIFE OF WHAT PHYSICIAN DID TO PREPARE**
2. (if not already answered in previous questions) Did your exam preparation activities have any impact on your life? If so, what/how?
   - Practice (time away from patient care, distraction from patients/other duties, etc.)
   - Personal life (family time, travel time)
3. What was the financial cost of what you did to prepare?

*Probe for:*

- What kind of reimbursement or credit did you receive for your preparation, if any?
- Any CME credit?

1. In general, does knowing you’ll have to take an MOC exam influence your CME activities – what you choose to do to get CME, how you engage with your CME activities/materials, etc.? If so, what/how?

[interjection point – check-in with co-interviewer, if present]

1. **IMPACT OF PREPARATION ON PHYSICIAN’S CLINICAL KNOWLEDGE**
2. Thinking back over what you did to prepare, can you give us examples of specific clinical knowledge that you learned?

*Probe for specifics:*

- General ideas/areas
- Specific points of information

1. Did the exam process affect how you think about clinical guidelines – make you aware of new information, reinforce what you already knew, etc? If so, how?

*Probe for:*

- Make you aware of new information?
- Reinforce what you already knew?
- Increase / decrease your confidence level in your knowledge in this area?
- Change your sense of the nuances of guidelines, and when to apply them or not?

1. Did you share any of what you learned or reviewed with other physicians– people you were studying with, colleagues, etc? If so, with whom / how?

*Probe for:*

- What was their reaction/response? (if any)
- Did it lead to any further discussion/changes to practice/research etc?

1. **IMPACT OF PREPARATION ON PRACTICE**
2. Can you give us examples of how what you learned (if anything) has affected your practice? [ie changed anything about the care your patients receive]
   - Or examples of how what you learned could potentially lead to changes in the future?
   - If someone was looking at your practice from the outside, where might they see the impact of these changes – ie how would these show up? Changes in cost of care, efficiency, quality, etc?
3. Can you give any examples of how what you learned may have any impact on how you arrive at a diagnosis or make treatment decisions?

*Probe for:*

- Make you better able to diagnose conditions that otherwise wouldn’t have been on your radar?
- Clarify how to diagnose or treat conditions you already knew about?
- Affect your confidence in your own knowledge in the area of diagnosis?

1. Did anything you learned or reviewed the exam affect how you manage resources, for example, increase or reduce the tests you order, etc?

- Any impact on referrals – conditions you refer to others, volume of referrals?

1. Other than what we’ve already discussed, did any of the information you reviewed for the exam reinforce what you already knew, or what you already do in practice? If so, what/how? If not, why not?

[interjection point – check-in with co-interviewer if present]

1. Focusing on the exam – did anything about the feedback from the exam (such as your score) lead you to do or study anything more as a follow up? (for example, seeing a question on an area where they didn’t study, or that framed an issue a little differently?)

*Probe for:*

- Specifics of anything they did to follow up, and why/how

1. In general, thinking about the overall exam process – the entire process of preparing for the exam, taking the exam, getting your score, and so forth – how did this affect your confidence in your own medical knowledge, and the way you keep up? (for example, “I really know my stuff” / “there are areas where I should refer out more” / “this was all irrelevant to my medical knowledge”)?

*Probe for:*

- Any effect this change/reinforcing of perspective might have had on their practice

1. (ask if not covered already) Again, thinking about the overall exam process – did anxiety about the exam affect what you studied, and/or the way you studied? If so, how?

*Probe for:*

- General feelings of anxiety around test taking

1. (Check-in with co-interviewer, if present – additional follow-up questions / anything to be expanded on)
2. (If time allows – ask why they chose to participate in the study)

**Section 4: Recruitment protocol**

This section describes the sampling frame and the recruitment procedures.

**aTable 1: Criteria for participants sampled from Spring 2016/Fall 2016 American Board of Internal Medicine (ABIM) and American Board of Family Medicine (ABFM) MOC exam administration**

|  | ABIM | ABFM |
| --- | --- | --- |
| 1 | Full time primary care non-subspecializing general internists | Full time family physicians, non-hospitalists |
| 2 | Did not indicate that they did not want to participate in ABIM studies | n/a |
| 3 | Responded to the following post-MOC exam survey question regarding their attitudes about MOC exam: | |
| “The examination was a fair assessment of clinical knowledge in this discipline.” | “Do you agree that the examination questions reflect the knowledge family physicians need every day in practice?” |
| 4 | First time MOC exam attempt in cycle, or failed last attempt only (e.g., nobody who failed twice or more) | |
| 5 | Had to complete ABIM’s practice characteristics survey | Had to complete ABFM’s MOC demographic survey. |

| **Recruitment procedures:** |
| --- |

1. First week, randomly sort ABIM and ABFM list
2. Randomly pick the 40 from the list of ABIM and 40 from the list of ABFM physicians that met study inclusion criteria and send them recruitment emails.*
3. Patterns of email for each person: Intro day 0; follow up emails, assuming no response, on days on 2, 4, 6.
4. At day 7,
   1. Evaluate breakouts of acceptance by practice type (e.g. Academic faculty practice, Solo, Group private practice, Group staff model HMO, Residency teaching clinic, Hospital-owned office based, Others), % female physician, % US-medical school, % DO for ABFM, % of first takers who failed. This will be used to spot any strange patterns.
   2. Repeat steps 1 to 5 giving more weight to under-represented groups (i.e., if female were underrepresented, pick a larger random sample of women than the population proportion)
   3. Process stops when 40 physicians from ABIM and ABFM participate in the study.

*As the weeks progressed we increased the number of emails sent to as much as 60.

**Section 5: Selected quotes from physician interviewees about how knowledge acquired when preparing for an MOC exam benefited their patient care**

This section presents an expanded set of quotes from interviewees about how knowledge acquired when preparing for an MOC exam had a positive effect on the care they could provide their patients. The two tables in this section present the same set of quotes, organized differently:

- aTable 2 organizes the quotes by physicians’ certification board and interviewee number (used as a basis for counts in the paper for learning that impacted practice)
- aTable 3 organizes the quotes by main relevant theme

| **aTable 2: Selected quotes from physician interviewees about how knowledge acquired when preparing for an MOC exam benefited their patient care – organized by physiciana** | |
| --- | --- |
| **Inter-viewee** | **Quotes (1-31 for ABFM physicians; 32-63 for ABIM physicians)** |
| **ABFM physicians** | |
| 1 | [L]ooking at cardiovascular predictions and using that as a basis for prescription of statins rather than absolute lipid levels like in terms of prescribing studies. Not treating to drive LDL numbers down below a certain level but actually, the statin as the end goal based on cardiovascular risk prediction… [B]ased on the newest lipid guidelines, that’s probably something that I adopted when I was studying... |
|  | [W]ith the different skin conditions, just being able to recognize… having that fresh on my mind… somebody would come in and… it's almost like a diagnosis from the doorway, you can kind of see it, and it's just something that I just reviewed… [T]hat was actually pretty helpful in a number of situations. |
| 2 | [For learning about] infectious diseases [studying is] very good.  Stuff like screening for tuberculosis, how to read TB skin test which has changed since I was in residency, using QuantiFERON gold and then also not giving like a set diameter of to say it's positive or not. |
|  | Something that I learned during the course that has affected my practice?  Well, one of the blood pressure guidelines that's very useful is that, the course thought me to be less aggressive with blood pressure use of the — we harped this 140 over 90 for every single person that walked the planet.  Regardless of age, gender, race, whatever.  But now, the new balances is 150 over something — 150 over 90 and so it taught me to relax and not be so aggressive with blood pressure management in older folks. |
|  | [A]nother big example is the management of heart failure, and how it's really a continuum, and you basically look at it as a way of staging people and then afterwards preventing them from going into the next stage... [I]t’s very much guideline-based as opposed to just giving them a water pill every time they feel swollen. |
| 3 | I'd say there were some things in the review... that probably did impact my practice to a degree, like... I've said to some of my elderly people, “Well, your A1C doesn't have to be as normal as the next person's because you're elderly and that's acceptable.” [T]hose are... the things I shared with my partner, like, "Did you know this? Did you know they changed this?" |
| 4 | [A]t the end of life care, I did actually enjoy reading about that… really from a personal level, ageing parents, ageing in-laws, and just what the standard of care is in terms of determining when someone is no longer able to make their own decisions or what to look at, at the end of life.... |
| 5 | [I]t was... the indications for using aspirin as a cardiovascular prophylaxis.  And I learned that I was prescribing aspirin way too liberally because [I thought], "What the heck. It ain’t going to kill you." |
| 6 | I ended up studying on [orthopedics], so I think I’ve got a better assessment of musculoskeletal injuries… I learned about DRUJ (distal radioulnar joint) injury... which is something I hadn’t thought of at all, and now I assess for that when I see patients, when they fall on their wrist… I learned the... Thessaly Maneuver for meniscal injuries, which is an exam technique, and I use it regularly. |
|  | I really was able to have a good differential diagnosis and management of red eye…. [A]fter I did the hypertension modules, I felt stronger. After I did the diabetes module, I felt stronger. Those are important topics. |
| 7 | [O]ne of the things I learned when I was studying is... I practice a lot of defensive medicine. Like, you do it because, let's say, the patient wants to, but it's not really clinically appropriate or it's not according to the guidelines. So now, I learned to maybe talk to patients more, spend more time instead of just ordering what they want because they want it, but [instead] ordering it because it's appropriate or it's up to date in terms of guideline recommendations... Let's say I have a 78 year old patient who wants a colonoscopy. The guideline says, “After 75 years old, especially if they have a lot of comorbidities, you don't recommend doing colon cancer screening anymore.” And before, I used to just order it and do what the patient wants, but I now talk to them more about the risks, the complications, rather than just ordering it. |
| 8 | I’m doing fewer referrals, because it occurred to me when I was doing the board review course... that one of the reasons why I got stuck in a lot of specialty questions, is that I don’t really deal with them besides from referring to them... [W]e in family practice now, especially in bigger centers, we tend to refer out..... like rotator cuff tears, for instance. I don’t automatically send to an orthopedic specialist now, because most rotator tears can be managed conservatively. |
| 9 | [O]ne thing that I definitely can think of that changed... was, I had a patient who had had a TIA, what sounds like a TIA, earlier in the day last year, and I went ahead and did some imaging, but I didn't hospitalize her and she went on to have a stroke. I had a similar patient recently and, using the ABCD guidelines for TIA, I realized she was at high risk of progressing, so I put her in the hospital and was more aggressive about the management and [I] suspect her outcome was probably better than it might have been otherwise. |
|  | [J]ust going through the most recent data and the STAR*D trial changed a little bit of my thinking about progression of antidepressants and the sequence of how I approach that. |
|  | [I]n the area of women's health… I had... a little additional comfort, and so have referred less than I would've before. |
|  | I... have rethought looking at microalbumins for people that are already are on ACE inhibitors as probably not a great use of resources. |
| 10 | With the new hyperlipidemia guidelines, they were complex enough and different enough from the old guidelines that I basically made a 3”x5” card and printed three or four pages from the lecture on that, so I could carry it in my shirt pocket. It’s been a year and half now and I carry that in my shirt pocket to this day, and part of the guidelines is to do a calculation with... an app you can download too, to determine what a patient’s 10-year risk for a heart attack is, where I wasn’t doing that at all prior to my reeducation. Now, probably five times a day, I’m taking out my calculator or my app and [I] say, "Okay, let’s calculate your 10-year risk of a heart attack, because that determines whether I should recommend medicine to you or not." That’s straight out of the guidelines and straight out of the lecture, and that’s every day. I mean, I probably did it five times today when I was in the office. |
| 11 | Some musculoskeletal stuff… like the Iliotibial Band Syndrome, I didn't – I hadn't known that.  Now, I understand it when somebody comes through. |
| 12 | I’ve mentioned… patient education and specifically with regards to dementia, I made a little hand out on dementia information… [T]here was also… part of the review on statistics and sensitivity, and I got all that clear in my head, so I'm able to talk to patients about that. |
| [We have] all these other [practice] initiatives going on, and there’s a lot of emphasis on workflow and team care and patient interviewing and quality measures and all these things that are, let’s say, non-clinical and more about work flow and whatnot.  So less time is devoted to basic science knowledge, basic study review. So in essence, by doing the exam, it kind of forced me to take a little extra time to look at the science part of it. So I feel like now I’ve kind of I’m up to speed and I feel more confident on the clinical side that I can go back to other things that we are trying to do. |
| 13 | Some of the public health [content]… like the “stop smoking” phone bank… that I probably didn’t realize were there to help, offering other things to my patients…. I was able to find more written material for patient handouts… in terms of educational-type things…. |
| 14 | Some of the stuff [I studied] I didn’t realize I was so far behind on… [For example, I] found out, like, we should be treating hypercholesterol not based on numbers. We should be doing it based on risks of a heart attack…. I was sort of like behind the ball on that, and so the board review course kind of caught me back up. So I’m doing that now. |
| 15 | Diagnosis … you know, when to do imaging… in certain situations… [K]nowing when to do a CT of the abdomen, you know, who to do on-screening chest CTs for lung cancer, and when. And then when is a PET scan useful, when is it not? Those kinds of things, and those sorts of diagnostic tools--You know, we tend to, I think, overuse those tools, and I was able to use them a little less… [M]ost of that overuse is rooted in lack of confidence about other diagnostic skills… I think I was able to move that needle a little further in the direction of doing less… without comprising the patient care, you know… |
| 16 | I've been able to trim down my thyroid work up… I used to, kind of, just order a battery of tests, and now I [am] able to trim that down based on my suspicion of “hyper-“ versus “hypo-“. |
| 17 | I learned that ACE inhibitors are recommended for peripheral vascular disease, and I had never even heard that or read that anywhere…. I was like, “Really?” And then I went and… looked it up and I was like, “Okay, when did this happen?” … [T]hat was an example of something that I was kind of like, “Where was I at? How did I miss this?” |
| 18 | [T]here’s a whole bunch of different medications that have come out that I don’t use routinely. So… just learning a little bit more about how they work and some side effects that those patients may incur, it just helps me when they come back on this medication to say, “Oh, I know what that is. That may be contributing to your bladder infection. We’ll just have to see how things pan out if you have a bunch of them. We may need to change that.” |
| 19 | [W]hen someone had a rheumatologic disease, before I took that [board review] course, I would just sort of shut down and send them to the rheumatologist. I wouldn’t try to figure out what was going on. Then, after the course, I tried to figure [it] out, and actually ended up treating a lot of people instead of sending them off [to the subspecialist], like with lupus and sarcoidosis and things like that… |
|  | [E]verybody thinks you need a pap smear once a year but [in the review course] they were talking about, you just need them every three to five years... |
|  | [T]here was a headache lecture that talked about cutting down on MRIs, and so I don’t probably jump to an MRI… [Before] I would just jump to MRIs pretty quick, and I don’t do that as much anymore. |
| 20 | [A]dding folate to people on SSRIs, I remember that one. And actually even now I kept my study notes because there are a few little things that I wrote down… The folate one’s a good example where I did implement that in practice as well. I have a lot of people on SSRIs and I say, “Hey, I was just recently studying for the boards, and apparently there’s a recommendation to try adding folic acid and it’s over the counter and you can just take one pill.” |
| 21 | I would go back to some of the hypertensive and lipid management guidelines, how often I test people’s cholesterol now. I think I’ve decreased how often I test them. |
| 22 | [T]he guideline about the screening for abdominal aneurysms for men over the age of 65… was a really hard one for me to get in my brain. For now, I can fairly confidently target people that need that, but there [were] so many other guidelines that I was completely unaware of. |
| 23 | I was surprised to learn that statins should be taken right before, you know, pre-operatively. Back when I took [the exam] the first time, [there] was a big thing on beta-blockers, and now it was statins, and I don't know how I missed that... So I learned that, and that had impact on my practice. |
| 24 | [H]yperestrogenism… is more and more seen to be more common than we have previously thought, and I have really thought about hyperestrogenism… and these new guidelines with checking potassium and using more Spironolactone, and that sort of thing. You know, it made [me] think about a condition that’s more common than [I] realized, and it probably affects my looking for that more diligently. |
|  | The new… guidelines about hypertension, and the stratification and streamlining of hypertension therapy, and to customize therapy according to the patients sitting in front of you rather than just “shotgun” guidelines… [I]t helped me get people able to control their pressure better, with less side effects, and it has allowed me to, perhaps, use lifestyle changes more effectively and reduce the amount of medication that I prescribed. |
| 25 | [S]pecifically on immunization practices [my practice] changed, specifically giving pneumococcal vaccines at age 65… giving a booster. |
|  | I think the psychiatry portion [was] helpful to review… specifically when treating depression and starting with SSRIs and adding other medications, which to supplement if they're not working… [I]t did impact my practice somewhat. |
| 26 | [O]ne that really sticks out in my brain… I had a patient that… maybe I could have helped him sooner than I did. He had a left bundle branch block and he had a prolonged QT interval, he had the criteria for a pacemaker, and I didn’t know that before [studying for] the boards, I learned that in the process… he actually had been seeing a cardiologist, and I sort of trusted their care, but the cardiologist hadn’t referred him for a pacemaker and, had I known that, at least I could have saved him, probably, a year of being short of breath, and he would have felt much better a year earlier. |
|  | I remember a specific thing that I did not know: the recommendation for screening for lung cancer… a smoker at 55 years old should have a screening CT of their lungs, and I never knew that. |
| 27 | [O]ne of the topics was on STDs. [In our practice w]e see a lot of STDs, do a lot of STD screenings…. [S]pecifically for trichomoniasis, there was a recommendation that people, usually women, do a follow up… So that… made me think to tell patients, “You should come in for a follow up.” So yes, there [were] definitely instances where it made a difference in how I practice, yes. |
| 28 | [A]lgorithms and… clinical guidelines… clarifying -- well, you need these various criteria. I'm thinking about Lyme’s disease, I'm thinking about chronic fatigue, fibromyalgia, things were… there’s more bullet points to help a clinician figure out if the person has this problem or not… [There’s a little bit more data… to help interpret, and I think the question bank gave us tables, and kind of reminded us of those criteria -- the stepwise approach for treating asthma, “If it’s these symptoms and this chronicity of the problem, then you’re at step two, and you need these medications, and here’s an algorithm to go through, and make sure you’ve tried these different things.” So, that was part of the study program. I think that was helpful to have that updated information. |
| 29 | [T]here’s a lot of people that are taking omeprazole or h2 blockers… you know, for GERD, and they just keep renewing the prescriptions and actually some of those people need to be sent in for an EGD or other studies sooner than they are now… [T]hose are things that… were pointed out in preparation for the exam that were important that changed [my] practice to refer more people out… because GERD should be only treated for short periods of time and then if it continues, they need a workup to make sure that they don’t have some other condition… like cancer. |
| 30 | [T]here were some newer tests that have become available that… I’ve been trying to implement a little bit more... The stepwise approaches to a lot of chronic conditions, to include diabetes and COPD and CHF and stroke, was revamped a little bit… Those types of things are what have changed pretty significantly in the office... |
| 31 | [L]ooking at patients, how long they would have to be on anticoagulation, or are they candidates for anticoagulants and therapy? Patients where they should be on insulin, versus pills, or both at the same time. |
| **ABIM physicians** | |
| 32 | [A subspecialty section of the board review course] that used to be my bread and butter 12 years ago.... was like Chinese to me and I didn’t get anything right.... my take-home message from that was... how quickly you become uneducated in things that you don’t do... [I]t did give me pause that it’s important to know... that maybe you should pull the trigger for specialty consults sooner on some things. |
| 33 | [W]hen it came to… hypertension goals… there's so much stuff out there now.  Like, “This is the target, that’s the goal for this category of patients, diabetics, or renal insufficient patients.” So, it gave me some clarity on what I felt like I needed to do with the patients, and what goals I should shoot for. |
| 34 | I see a lot of self-pay patients… When they have [mild] rheumatoid arthritis, I really just start methotrexate myself instead of referring out… because... they may not go to the specialist, because of cost. |
|  | [B]efore... I [would] usually write either... cephalexin or Bactrim for the treatment of skin infection… [A]fter [studying I] write... doxycycline… And also after the [exam], I do not always write antibiotics, because most of the time.... most people who are young and healthy... do not need the antibiotic. |
| 35 | [I]f I know the colonoscopy screening guidelines, then I know that seniors over 75 really shouldn’t be getting screening, and I also know now that stool occult blood is just as effective… I'm going to use that to help build my [network’s] authorization platform, and build how we manage colon cancer screening in our network…. I'm required to review authorizations as part of my job, so there is much more heightened awareness now where I can address authorizations that are inappropriate, because I understand the guidelines now much better. |
| 36 | [O]ne thing that changed a lot since I was in training was the oral anti-coagulants… I think I finally got more comfortable with them… [I]n different new medicines, I tend to be a little bit of a late adopter… I think I got more familiarity with those. |
| 37 | I always thought I was pretty strong in [scleroderma]. And… the classification of scleroderma has changed... And I tell you, I looked at my [scleroderma] patient for the first time completely different. And I found myself saying [to myself], “All these years that you’ve taken care of this women, you may not have realized that she has this form as opposed to this other form.” And have we been doing the right thing all along?… From this point on, I have to understand how to classify that patient properly, so we don’t lose time, don’t initiate the wrong treatment and refer them properly. |
| 38 | I feel more confident in my own knowledge. I don’t have to use the specialist just to back up my diagnosis…. I can speak…more accurately, I think, as I hand off a patient, and tell them what I’m concerned about. I don’t have to wait for the specialist to… start from square one. They know more about where I’m coming from, as I send the patient. |
| 39 | I think since I’m diagnosing [patients] down the pathway a little bit further, I’m starting them on treatment a little bit earlier... [S]tarting the treatment without waiting for the specialist... [patients] were definitely much… happier because they can feel better [faster]. |
| I really wanted to master… the pathophysiology. Like, let’s take COPD and asthma... They get mixed up so many times. So I really wanted to [learn]… all the way down to the pathophysiology, how are they different?... I said, okay, asthma is more inflammatory.  COPD is more like an air-trapping lung disease.  So I wanted to get down to the finest essence… But you really need to have a starting point, where that disease really got its core essence.... [It] has helped me -- yeah, do my job much better if I know the core essence of where do I step in into the pathophysiology. |
| 40 | [O]rthopedics, sort of things… [studying] sort of brought to my attention.  So, focusing more on doing office orthopedic evaluations… that sort of thing. |
| 41 | [T]here was one or two changes in practice.  I guess asymptomatic bacteriuria in a diabetic, guidelines had changed.  There was one or two things like that where I really – Since I studied, things had changed. |
| 42 | I read sections... and I thought, "It's really helped me in my day-to-day practice.'” When I read the neurology section, the headache, the multiple sclerosis, the different type of migraines, what to give for this one, not to give for that, that’s a subject we deal with in our office almost every single day. And at the same time, as an internist, you probably do not pick a neurology book to read that much. So, I feel that section... really refreshed my memory and prepared me to be a better physician. |
|  | Dermatology, probably the most important thing is diagnosis, and I felt that I did refresh my memory very well reading that section, and I feel that the differential diagnosis, how to distinguish this from that... I felt that I did benefit from reading that book. |
|  | [I]n neurology in particular, where probably you're going to refer the person anyway, [the patient] needs to be seeing a neurologist, but I think now, I can -- because of that [studying], [I'm] not necessarily going to delay the referral, but I can explain it to my patient a little bit better about what I'm doing, why am I doing this, why it would go in this direction, not that direction. |
|  | [H]ere in the office, my partner... we frequently do a 2-minute chat about this condition or that condition... And he's... grandfathered in internal medicine... so he doesn’t have to take the exam anymore. So, I actually find myself enjoying giving him what the board currently thinks about this and that, and he listens very attentively to that. And it comes also when I round with the hospitalist over the weekend, we sit initially for about 40 minutes in the morning and we distribute the patients, but we also discuss them briefly. If any of them have a challenging case, he might bring it up and say, “What do you think, guys, is there anything you see that I'm doing or not doing, or where to go next?” And that was also an area where I found myself answering them much more frequently than before, because I had more refreshed information. |
| 43 | [O]ne thing is colon cancer screening, that was very helpful... [I]n the past, I would always say, "If you have a polyp, you need a follow-up colonoscopy in 3 years"... and I didn't really appreciate... that [n]ot everybody, not every polyp needs a follow-up colonoscopy in 3 years... [Y]ou know, anytime you tell a patient he doesn't need a colonoscopy, he's eternally grateful. |
|  | [W]ith the PA that I have here, she and I work closely together.... I think we manage hypertension better since [the exam] and we have these discussions... [I]t was triggered by board prep, for example... for Black patients with diabetes, rather using an ACE inhibitor, to use calcium blocker plus diuretic for hypertension, so that was new information for me. I always used ACE inhibitors for everybody. So that kind of gets triggered and gets continued... |
| 44 | [S]tuff that centered on whether or not people required actual surgery either for diverticulosis or for inflammatory bowel disease, ulcerative colitis maybe that stuff I thought was kind of useful--the surgical indications, not necessarily the indications for other types of treatment. |
|  | I thought some of the EKG stuff was a nice refresher and I thought that some of the review in cardiology of valvular heart disease… I got a lot out of… [A]ctually having a working knowledge of the criteria for... what goes to surgery, being able to... run through that stuff with your patients after they get evaluations as to why these decisions are made. |
| 45 | I would say [my] rheumatology work up is much more comprehensive now. |
|  | There are new medications and guidelines in diabetes now than when I originally trained in internal medicine. That was an important area of learning. |
|  | We [used to] do Paps every year. Now we find out that it's every three, or five years... It's more convenient for the patient, so that impacts patient care. And more cost effective for healthcare. |
| 46 | And vaccines definitely... increase protection, and decrease the incidence of disease for the new vaccines that we implement… The vaccination recommendations from the exam helped. Like routine vaccinations, what age you’d have to be to have all these vaccines routinely, and also travelers’ diarrhea questions were helpful… Anything like that on the boards helps open your eyes to what to do. |
|  | Studying for the boards just opens your eyes to some uncommon conditions... You start to say, “Okay... these other patients that come in with high calcium in my office, and I don’t know what they have... the sort of patients that come with these weird abnormalities... yeah, this could be this disease, it could be that.” So definitely, it does help in some of the [rare] conditions. |
|  | [I]t helped me in focusing more on what to order, instead of just ordering a whole battery of test for certain conditions… [B]efore, we would see, like, this abnormal value, then we would just go order 20 other tests, just to see what we get. But I think in reading for the boards, there [are] a few conditions that I said, “Okay, maybe this is it, and this is what I need to do.” More focused ordering. |
| 47 | GI, there’s the whole “who needs an upper endoscopy for GERD?” I think a lot more people get them than the evidence supports, so it was nice to review that evidence and be able to say to people, “look, this is simple, I just took a course from an academic and there is no need to do this.”... , like a patient comes in, and they’ve had heartburn for two days, and they say, “who should I go to for an endoscopy?” And I can say to them, “you are not losing weight, you are not a smoker, it’s only been going on two days - we can give you a trial of medicine for four weeks, and if it goes away and doesn’t comes back, we are done” rather than saying, “Yeah, okay, go and get an endoscopy.” |
|  | I actually had a case - I don’t deal with anorexia a lot, but they gave one or two of those in the course, and it so happened, I had a patient come in who had clearly had just lost a lot of weight. And I never would have checked her phosphorus level, because… that was one of the questions I went over [while studying], so, it was normal, but I knew to do it, so that was nice. |
|  | Just being more knowledgeable, it should help you to do more and refer less, or be more comfortable with stuff. So, I think like, in rheumatology, for example, I treat probably five people that have had temporal arteritis, that have been to a rheumatologist. I suspect, next time, I’ll probably just do it myself, because, now, I’ve seen that there is no magic to this, and I know what they do, and I spent 20 minutes learning about it. So, if that were to come up, I’d do it myself. |
|  | H pylori testing is something that I knew about, but can’t say I’ve done a whole bunch of.... I’ve actually started doing a lot more of that... which I can’t say I had ordered before I took the course… I don’t think it would be like, the person would be dead, but, it would be something that would just get figured out sooner, rather than later. |
|  | [T]he cardiology thing is, always, they are trying to make everyone’s blood pressure really, really low. And, for the 85 and 90-year olds, I won’t do that anymore, and I’ll tell them, “I’m not doing this, and here is why”. I think that’s a real change - that was the guidelines that, I had read that, and knew it, but I think I probably do it more strongly now. |
|  | There are many scenarios where anyone who’s ever had a cardiac problem, ever, whether they’re asymptomatic and running marathons, the surgeons will say, “I need a stress test”. And the answer is, “No, you don’t. They are fine”. So, I think, being able to push back a little bit - I’ve done that since I took the boards. That actually changed how I practice. |
|  | It just gives you confidence you're doing the right thing, and that you could tell the patient about it… “This is the right thing to do”… I would say, “You know, I just read about this on my board exam, and I just—“… Especially if it was, like, something that I don't see all the time... And that was pretty powerful. Otherwise, if I weren't [studying at] that time, I don't think I would have that conversation. |
|  | I think when you appreciate all the different avenues of [cancer] therapy there are now, whereas... 20 years ago... it was like, you get lung cancer, “here is your bucket of potion, good luck”. Now, it’s, “let’s talk about the molecular genetics, and let’s understand where in the cells dividing we now have targeted therapies for”. And figuring out which combination of these things to use. It’s a lot more complicated than it was 20 years ago. I think, to be a practicing internist, just knowing what your subspecialty colleagues are doing is helpful. It’s not like the big black box anymore. I think it’s good for us as a community of physicians to have some knowledge of what’s going on out there. |
| 48 | [M]y efforts to review and reread these books really helped me keep abreast with the changes in medicine.  I think my patients are the recipients of this increased knowledge that I got from the review… [S]ome of [the guidelines] made more sense to me and some of them are... things I agree with, with the changes.  So I think overall, I think [it was] very good for my practice. |
| 49 | I would say [there were]... two or three of those moments... where I could literally say, "Oh wow, this is completely new". I remember... one of them was completely opposite of what we learned, where new data had come out that, “You should not do that anymore and should do it now this way”. I think it was with HIV medications... where, you know, "This is not anymore the case, this is now the case" ... [It was] an eye-opener for all of us... |
|  | I referred a patient to a specialist for evaluation or treatment and the recommendation was although correct, not exactly up to date, which I just learned. That is something that I did discuss with the specialist, you know not to-- not in an offensive way but you know just, as more of have you ever thought of doing it this way they maybe new literature out , things like that. |
| 50 | I suppose that [someone looking at my practice] would see [improvement in] my discussions with patients about why I want them to do things even if they don’t do it, with regard to statins. Or… why I'm weighing risks or benefits for specific guidelines--being able to verbalize what I’m thinking better, more than actually changing what I’m doing... |
| 51 | I could go down every book. Every book I could – from dermatology, thinking of different rashes and stuff and, “oh yeah, I should – you know what, I should do that better, I should know that better.” Cardiology -- every single book, there was plenty there that added to my knowledge base and was pertinent to what I do every day and enhanced my understanding, I could go through every single book…. [E]ndocrinology, refreshing my memory on all the thyroid disorders and thyroid nodules and how to manage them, there was – there was plenty there. |
| 52 | There’s a calculator, criteria for diagnosing deep vein thrombosis… [B]asically it’s a way to determine who should go right to an ultrasound to make sure that they don’t have a clot, or someone who could get a blood test… just, say, 6, 700 dollars for a diagnostic test…. Yeah, I think that that does have a great impact… |
| 53 | [W]hen I would encounter the patient, the experiential, learning, for example, recommendations for breast cancer or colon cancer screening, or prostate, PSA, some of these disease screening.  On the MKSAP, it kind of was brought to say, “This is the best practice, what we know in the literature, right to this day.”  And then I can go back in my practice and, “Well, you know, you don't need a PSA,” or, “You don't need a mammogram,” and those kind of things. |
|  | I [had] a case of a patient who had some neck mass or whatever.  And then I was studying for the boards… So I had a dialogue, it was really triggered by me and my preparation.... Let me get an opinion from the ENT guy, who's board certified: “What would your board say to this? Is what you do practice, is it in line with what I'm… learning in my preparation for taking this board?” |
|  | [I]t gave me reassurance that I'm doing the right thing.  And then you're carrying on a conversation with a patient, to tell them why not. Because people have an expectation, “I want this, I want hemoglobin A1C every three weeks,” or whatever… [Because] patients, when they see it on the news… they think that that's the best practice standard. And it often is not… [Patients] want to hear – “Doc, tell me what I need to do.” … And the other thing I liked about it, along those lines, was ordering tests…. It was like, “[T]he test is not going to add anything, so you don't need to do a bone marrow biopsy.” Or, “You don't need to order a MRI.”… “It takes 6-8 weeks and then it's going to recover, you don't have to get an x-ray.” |
| 54 | [T]hey asked a question about Lyme disease in the boards. It was how do you diagnose and treat Lyme disease, it’s a clinical diagnosis. And when you see it especially early... don't be looking for titer of Lyme disease especially for somebody who is coming to your office for chronic pain or chronic fatigue. So my physician assistant came like three months ago and said... "I have a patient, elderly woman, an African woman who stays in the house all the time, doesn't go anywhere but she was complaining of fatigue so I did titer for Lyme disease. Now the titer is high what do you want me to do?" I said, "This is exactly the question they asked in the boards. You cannot be doing titer for Lyme disease for somebody who has chronic fatigue. You have to work it up. What are the causes of fatigue?" It ends up that the patient has sleep apnea, she was not sleeping well, many things, and since [then] she has been using the CPAP machine, she is doing fine. |
| 55 | [S]ometimes [patients] say, “Well, I heard this on the news, I heard that--that’s not what you were saying.” I said, “Well, I hear what you were saying in your news there, and [that is] unfiltered information. But, I just got through the review course, I just took my boards, I just passed my boards, and that area was not discussed…” And then they go, “Oh, okay…” |
| 56 | The health maintenance screening guidelines were something that just gave me updated information on what was recommended for health screening… [I]t led me to investigate more of the latest guidelines, and maybe not do as many screening tests as I used to. |
| 57 | Mostly, I would say in the rheumatology disorders, the connective tissue disorders, is where I find the impact coming [most] obviously. Any other place where there are procedures involved, that kind of goes out of our hands, because we have to depend on a specialist. But maybe, [there are] somewhat less referrals if we are really watching for alarming signs and symptoms, and increasing our comfort level in trying to manage how far we are going to go taking care of a patient - "How much time can we wait and watch, instead of just, like, a knee-jerk reaction of referring to a consultant?" |
|  | I could reduce a significant amount of financial burden that a patient would have... because the payment [for seeing me] in the community health center for them is… significantly less compared to a visit to a specialist. So I guess I could say I could act as a specialist - I could be a representative for them down here... [H]aving this kind of underserved patient population takes our learning at a different level, because… we can help them better. |
| 58 | [Y]ou have more confidence, you have more information. Referrals, the less you know… or are comfortable with, the more you refer. So with better improved knowledge and up-to-date knowledge on topics, you are more confident… [Y]ou are like, “Oh no, I know I can manage this.” So you tend to refer less in those areas, like, “I know the next step here, that means I can go to the next step”… [O]verall it's very likely decreased some immediate referrals, some probably totally, and some a bit later when after some more work has been done… across the board. |
| 59 | [S]ome patients come to me, okay, and then they say, "Okay, well, do I need my colonoscopy?" So normally you say, "Well, you need to call GI." But now, if I have that report, I can tell them when the next colonoscopy is going to be due, you know. So I feel this will improve the quality of care that I don't have to send these patients to see GI which is going to cost them more money just to go for a consultation. They may not need anything done. |
| 60 | We started doing an EKG on the patient with hypertension who presents for the first time. |
| [E]ven having conversations with my colleagues, it’s quite funny because every time during the office meeting, something clinical comes up, they all look at me like, “you took the board, you know the best”, so it's... "No pressure!" (laughing) Starting from when to start the prophylaxis for Lyme disease, how many hours and for how long?... think recent study boosted my knowledge significantly. That’s – and as I said, I try to stay up to date anyway, but I think it’s -- sort of massive exposure did help, but it was sort of a systematic approach I think, because as I said, I went through all the topics. |
| 61 | [W]ith all the biologicals, of which there's just been so much expansion and that, it's really hard to keep up, and I don't prescribe them because they are prescribed by specialists. So… seeing what side effects to worry about, that's all good stuff when you're doing the review.… it gives you a little more confidence [that] when you see obscure drugs, you know what they are… |
| 62 | Opening up differential diagnoses, definitely my differential diagnoses were expanded by this business of studying, absolutely… Nephrotic syndrome, I’m sure that I had a discourse about the zillion forms [and] causes of nephrotic syndrome with my students who brought in a patient and said, “Let’s discuss this one”... I have definitely spoken about nephrotic syndrome more knowledgeably than I might have before I studied, with my students. |
|  | I absolutely learned stuff. Some of the stuff I relearned, some of the stuff changed names on me, and that was learning. Some of the antibiotics are new. Some of the cardiac drugs are new. So the things that I learned, I learned about, or at least I touched on a stack of new drugs, their side effects, what is useful, what is not useful... particularly in my line of work in sickle cell, you need to know all your newer anticoagulants. You need to know the codes, you need to know the side effects, you need to know which ones you could use in sickle cell. So the things that I learned that were pertinent to my world, and thrombosis, and actually part of the times I was doing hemophilia as well. So I learned a lot of new stuff. |
| 63 | [D]ifferential [diagnosis] on the rheumatologic side, I… sometimes use tests to drive what [I] think is going on [with a patient]… [T]his helped me… [P]utting the tests in a different order… more deliberate, as opposed to sometimes… being somewhat random…. |

aThese quotes are in physicians’ own words. Although reviewed by physicians (LL & LP), we cannot guarantee that the quotes are accurate or up-to-date in terms of standard of care.

| **aTable 3: Selected quotes from physician interviewees about how knowledge acquired when preparing for an MOC exam benefited their patient care – organized by main relevant themea** | |
| --- | --- |
| **Inter-viewee** | **Quotes by main relevant theme:**  I. Diagnosis  II. Updated guidelines  III. Use of new risk calculators  IV. Vaccinations  V. Appropriate prescribing  VI. Treatment of specific conditions  VII. Updated approach to testing  VIII. Reduced unnecessary testing  IX. Reduced unnecessary referrals  X. Increased appropriate referrals  XI. Communication with other healthcare providers  XII. Communication with patients  XIII. Expanded scope of practice |
| **I. Diagnosis** | |
| 1-ABFM | [W]ith the different skin conditions, just being able to recognize… having that fresh on my mind… somebody would come in and… it's almost like a diagnosis from the doorway, you can kind of see it, and it's just something that I just reviewed… [T]hat was actually pretty helpful in a number of situations. |
| 6-ABFM | I ended up studying on [orthopedics], so I think I’ve got a better assessment of musculoskeletal injuries… I learned about DRUJ (distal radioulnar joint) injury... which is something I hadn’t thought of at all, and now I assess for that when I see patients, when they fall on their wrist… I learned the... Thessaly Maneuver for meniscal injuries, which is an exam technique, and I use it regularly. |
| 11-ABFM | Some musculoskeletal stuff… like the Iliotibial Band Syndrome, I didn't – I hadn't known that.  Now, I understand it when somebody comes through. |
| 28-ABFM | [A]lgorithms and… clinical guidelines… clarifying -- well, you need these various criteria. I'm thinking about Lyme’s disease, I'm thinking about chronic fatigue, fibromyalgia, things were… there’s more bullet points to help a clinician figure out if the person has this problem or not… |
| 40-ABIM | [O]rthopedics, sort of things… [studying] sort of brought to my attention.  So, focusing more on doing office orthopedic evaluations… that sort of thing. |
| 42-ABIM | Dermatology, probably the most important thing is diagnosis, and I felt that I did refresh my memory very well reading that section, and I feel that the differential diagnosis, how to distinguish this from that... I felt that I did benefit from reading that book. |
| 46-ABIM | Studying for the boards just opens your eyes to some uncommon conditions... You start to say, “Okay... these other patients that come in with high calcium in my office, and I don’t know what they have... the sort of patients that come with these weird abnormalities... yeah, this could be this disease, it could be that.” So definitely, it does help in some of the [rare] conditions. |
| 54-ABIM | [T]hey asked a question about Lyme disease in the boards. It was how do you diagnose and treat Lyme disease, it’s a clinical diagnosis. And when you see it especially early... don't be looking for titer of Lyme disease especially for somebody who is coming to your office for chronic pain or chronic fatigue. So my physician assistant came like three months ago and said... "I have a patient, elderly woman, an African woman who stays in the house all the time, doesn't go anywhere but she was complaining of fatigue so I did titer for Lyme disease. Now the titer is high what do you want me to do?" I said, "This is exactly the question they asked in the boards. You cannot be doing titer for Lyme disease for somebody who has chronic fatigue. You have to work it up. What are the causes of fatigue?" It ends up that the patient has sleep apnea, she was not sleeping well, many things, and since [then] she has been using the CPAP machine, she is doing fine. |
| 62-ABIM | Opening up differential diagnoses, definitely my differential diagnoses were expanded by this business of studying, absolutely… Nephrotic syndrome, I’m sure that I had a discourse about the zillion forms [and] causes of nephrotic syndrome with my students who brought in a patient and said, “Let’s discuss this one”... I have definitely spoken about nephrotic syndrome more knowledgeably than I might have before I studied, with my students. |
| **II. Updated Guidelines** | |
| 2-ABFM | Something that I learned during the course that has affected my practice?  Well, one of the blood pressure guidelines that's very useful is that, the course thought me to be less aggressive with blood pressure use of the — we harped this 140 over 90 for every single person that walked the planet.  Regardless of age, gender, race, whatever.  But now, the new balances is 150 over something — 150 over 90 and so it taught me to relax and not be so aggressive with blood pressure management in older folks. |
| 3-ABFM | I'd say there were some things in the review... that probably did impact my practice to a degree, like... I've said to some of my elderly people, “Well, your A1C doesn't have to be as normal as the next person's because you're elderly and that's acceptable.” [T]hose are... the things I shared with my partner, like, "Did you know this? Did you know they changed this?" |
| 9-ABFM | [O]ne thing that I definitely can think of that changed... was, I had a patient who had had a TIA, what sounds like a TIA, earlier in the day last year, and I went ahead and did some imaging, but I didn't hospitalize her and she went on to have a stroke. I had a similar patient recently and, using the ABCD guidelines for TIA, I realized she was at high risk of progressing, so I put her in the hospital and was more aggressive about the management and [I] suspect her outcome was probably better than it might have been otherwise. |
| 22-ABFM | [T]he guideline about the screening for abdominal aneurysms for men over the age of 65… was a really hard one for me to get in my brain. For now, I can fairly confidently target people that need that, but there [were] so many other guidelines that I was completely unaware of. |
| 24-ABFM | The new… guidelines about hypertension, and the stratification and streamlining of hypertension therapy, and to customize therapy according to the patients sitting in front of you rather than just “shotgun” guidelines… [I]t helped me get people able to control their pressure better, with less side effects, and it has allowed me to, perhaps, use lifestyle changes more effectively and reduce the amount of medication that I prescribed. |
| 26-ABFM | I remember a specific thing that I did not know: the recommendation for screening for lung cancer… a smoker at 55 years old should have a screening CT of their lungs, and I never knew that. |
| 33-ABIM | [W]hen it came to… hypertension goals… there's so much stuff out there now.  Like, “This is the target, that’s the goal for this category of patients, diabetics, or renal insufficient patients.” So, it gave me some clarity on what I felt like I needed to do with the patients, and what goals I should shoot for. |
| 43-ABIM | [O]ne thing is colon cancer screening, that was very helpful... [I]n the past, I would always say, "If you have a polyp, you need a follow-up colonoscopy in 3 years"... and I didn't really appreciate... that [n]ot everybody, not every polyp needs a follow-up colonoscopy in 3 years... [Y]ou know, anytime you tell a patient he doesn't need a colonoscopy, he's eternally grateful. |
| 47-ABIM | [T]he cardiology thing is, always, they are trying to make everyone’s blood pressure really, really low. And, for the 85 and 90-year olds, I won’t do that anymore, and I’ll tell them, “I’m not doing this, and here is why”. I think that’s a real change - that was the guidelines that, I had read that, and knew it, but I think I probably do it more strongly now. |
| 48-ABIM | [M]y efforts to review and reread these books really helped me keep abreast with the changes in medicine.  I think my patients are the recipients of this increased knowledge that I got from the review… [S]ome of [the guidelines] made more sense to me and some of them are... things I agree with, with the changes.  So I think overall, I think [it was] very good for my practice. |
| 56-ABIM | The health maintenance screening guidelines were something that just gave me updated information on what was recommended for health screening… [I]t led me to investigate more of the latest guidelines, and maybe not do as many screening tests as I used to. |
| 60-ABIM | We started doing an EKG on the patient with hypertension who presents for the first time. |
| **III. Use of New Risk Calculators** | |
| 1-ABFM | [L]ooking at cardiovascular predictions and using that as a basis for prescription of statins rather than absolute lipid levels like in terms of prescribing studies. Not treating to drive LDL numbers down below a certain level but actually, the statin as the end goal based on cardiovascular risk prediction… [B]ased on the newest lipid guidelines, that’s probably something that I adopted when I was studying... |
| 10-ABFM | With the new hyperlipidemia guidelines, they were complex enough and different enough from the old guidelines that I basically made a 3”x5” card and printed three or four pages from the lecture on that, so I could carry it in my shirt pocket. It’s been a year and half now and I carry that in my shirt pocket to this day, and part of the guidelines is to do a calculation with... an app you can download too, to determine what a patient’s 10-year risk for a heart attack is, where I wasn’t doing that at all prior to my reeducation. Now, probably five times a day, I’m taking out my calculator or my app and [I] say, "Okay, let’s calculate your 10-year risk of a heart attack, because that determines whether I should recommend medicine to you or not." That’s straight out of the guidelines and straight out of the lecture, and that’s every day. I mean, I probably did it five times today when I was in the office. |
| 14-ABFM | Some of the stuff [I studied] I didn’t realize I was so far behind on… [For example, I] found out, like, we should be treating hypercholesterol not based on numbers. We should be doing it based on risks of a heart attack…. I was sort of like behind the ball on that, and so the board review course kind of caught me back up. So I’m doing that now. |
| 52-ABIM | There’s a calculator, criteria for diagnosing deep vein thrombosis… [B]asically it’s a way to determine who should go right to an ultrasound to make sure that they don’t have a clot, or someone who could get a blood test… just, say, 6, 700 dollars for a diagnostic test…. Yeah, I think that that does have a great impact… |
| **IV. Vaccinations** | |
| 25-ABFM | [S]pecifically on immunization practices [my practice] changed, specifically giving pneumococcal vaccines at age 65… giving a booster. |
| 46-ABIM | And vaccines definitely... increase protection, and decrease the incidence of disease for the new vaccines that we implement… The vaccination recommendations from the exam helped. Like routine vaccinations, what age you’d have to be to have all these vaccines routinely, and also travelers’ diarrhea questions were helpful… Anything like that on the boards helps open your eyes to what to do. |
| **V. Appropriate Prescribing** | |
| 5-ABFM | [I]t was... the indications for using aspirin as a cardiovascular prophylaxis.  And I learned that I was prescribing aspirin way too liberally because [I thought], "What the heck. It ain’t going to kill you." |
| 9-ABFM | [J]ust going through the most recent data and the STAR*D trial changed a little bit of my thinking about progression of antidepressants and the sequence of how I approach that. |
| 17-ABFM | I learned that ACE inhibitors are recommended for peripheral vascular disease, and I had never even heard that or read that anywhere…. I was like, “Really?” And then I went and… looked it up and I was like, “Okay, when did this happen?” … [T]hat was an example of something that I was kind of like, “Where was I at? How did I miss this?” |
| 18-ABFM | [T]here’s a whole bunch of different medications that have come out that I don’t use routinely. So… just learning a little bit more about how they work and some side effects that those patients may incur, it just helps me when they come back on this medication to say, “Oh, I know what that is. That may be contributing to your bladder infection. We’ll just have to see how things pan out if you have a bunch of them. We may need to change that.” |
| 20-ABFM | [A]dding folate to people on SSRIs, I remember that one. And actually even now I kept my study notes because there are a few little things that I wrote down… The folate one’s a good example where I did implement that in practice as well. I have a lot of people on SSRIs and I say, “Hey, I was just recently studying for the boards, and apparently there’s a recommendation to try adding folic acid and it’s over the counter and you can just take one pill.” |
| 23-ABFM | I was surprised to learn that statins should be taken right before, you know, pre-operatively. Back when I took [the exam] the first time, [there] was a big thing on beta-blockers, and now it was statins, and I don't know how I missed that... So I learned that, and that had impact on my practice. |
| 25-ABFM | I think the psychiatry portion [was] helpful to review… specifically when treating depression and starting with SSRIs and adding other medications, which to supplement if they're not working… [I]t did impact my practice somewhat. |
| 31-ABFM | [L]ooking at patients, how long they would have to be on anticoagulation, or are they candidates for anticoagulants and therapy? Patients where they should be on insulin, versus pills, or both at the same time. |
| 34-ABIM | [B]efore... I [would] usually write either... cephalexin or Bactrim for the treatment of skin infection… [A]fter [studying I] write... doxycycline… And also after the [exam], I do not always write antibiotics, because most of the time.... most people who are young and healthy... do not need the antibiotic. |
| 36-ABIM | [O]ne thing that changed a lot since I was in training was the oral anti-coagulants… I think I finally got more comfortable with them… [I]n different new medicines, I tend to be a little bit of a late adapter… I think I got more familiarity with those. |
| 61-ABIM | [W]ith all the biologicals, of which there's just been so much expansion and that, it's really hard to keep up, and I don't prescribe them because they are prescribed by specialists. So… seeing what side effects to worry about, that's all good stuff when you're doing the review.… it gives you a little more confidence [that] when you see obscure drugs, you know what they are… |
| 62-ABIM | I absolutely learned stuff. Some of the stuff I relearned, some of the stuff changed names on me, and that was learning. Some of the antibiotics are new. Some of the cardiac drugs are new. So the things that I learned, I learned about, or at least I touched on a stack of new drugs, their side effects, what is useful, what is not useful... particularly in my line of work in sickle cell, you need to know all your newer anticoagulants. You need to know the codes, you need to know the side effects, you need to know which ones you could use in sickle cell. So the things that I learned that were pertinent to my world, and thrombosis, and actually part of the times I was doing hemophilia as well. So I learned a lot of new stuff. |
| **VI. Treatment of Specific Conditions** | |
| 2-ABFM | [A]nother big example is the management of heart failure, and how it's really a continuum, and you basically look at it as a way of staging people and then afterwards preventing them from going into the next stage... [I]t’s very much guideline-based as opposed to just giving them a water pill every time they feel swollen. |
| 4-ABFM | [A]t the end of life care, I did actually enjoy reading about that… really from a personal level, ageing parents, ageing in-laws, and just what the standard of care is in terms of determining when someone is no longer able to make their own decisions or what to look at, at the end of life.... |
| 6-ABFM | I really was able to have a good differential diagnosis and management of red eye…. [A]fter I did the hypertension modules, I felt stronger. After I did the diabetes module, I felt stronger. Those are important topics. |
| 24-ABFM | [H]yperestrogenism… is more and more seen to be more common than we have previously thought, and I have really thought about hyperestrogenism… and these new guidelines with checking potassium and using more Spironolactone, and that sort of thing. You know, it made [me] think about a condition that’s more common than [I] realized, and it probably affects my looking for that more diligently. |
| 26-ABFM | [O]ne that really sticks out in my brain… I had a patient that… maybe I could have helped him sooner than I did. He had a left bundle branch block and he had a prolonged QT interval, he had the criteria for a pacemaker, and I didn’t know that before [studying for] the boards, I learned that in the process… he actually had been seeing a cardiologist, and I sort of trusted their care, but the cardiologist hadn’t referred him for a pacemaker and, had I known that, at least I could have saved him, probably, a year of being short of breath, and he would have felt much better a year earlier. |
| 27-ABFM | [O]ne of the topics was on STDs. [In our practice w]e see a lot of STDs, do a lot of STD screenings…. [S]pecifically for trichomoniasis, there was a recommendation that people, usually women, do a follow up… So that… made me think to tell patients, “You should come in for a follow up.” So yes, there [were] definitely instances where it made a difference in how I practice, yes. |
| 28-ABFM | [T]here’s a little bit more data… to help interpret, and I think the question bank gave us tables, and kind of reminded us of those criteria -- the stepwise approach for treating asthma, “If it’s these symptoms and this chronicity of the problem, then you’re at step two, and you need these medications, and here’s an algorithm to go through, and make sure you’ve tried these different things.” So, that was part of the study program. I think that was helpful to have that updated information. |
| 29-ABFM | [T]here’s a lot of people that are taking omeprazole or h2 blockers… you know, for GERD, and they just keep renewing the prescriptions and actually some of those people need to be sent in for an EGD or other studies sooner than they are now… [T]hose are things that… were pointed out in preparation for the exam that were important that changed [my] practice to refer more people out… because GERD should be only treated for short periods of time and then if it continues, they need a workup to make sure that they don’t have some other condition… like cancer. |
| 37-ABIM | I always thought I was pretty strong in [scleroderma]. And… the classification of scleroderma has changed... And I tell you, I looked at my [scleroderma] patient for the first time completely different. And I found myself saying [to myself], “All these years that you’ve taken care of this women, you may not have realized that she has this form as opposed to this other form.” And have we been doing the right thing all along?… From this point on, I have to understand how to classify that patient properly, so we don’t lose time, don’t initiate the wrong treatment and refer them properly. |
| 39-ABIM | I really wanted to master… the pathophysiology. Like, let’s take COPD and asthma... They get mixed up so many times. So I really wanted to [learn]… all the way down to the pathophysiology, how are they different?... I said, okay, asthma is more inflammatory.  COPD is more like an air-trapping lung disease.  So I wanted to get down to the finest essence… But you really need to have a starting point, where that disease really got its core essence.... [It] has helped me -- yeah, do my job much better if I know the core essence of where do I step in into the pathophysiology. |
| 41-ABIM | [T]here was one or two changes in practice.  I guess asymptomatic bacteriuria in a diabetic, guidelines had changed.  There was one or two things like that where I really – Since I studied, things had changed. |
| 42-ABIM | I read sections... and I thought, "It's really helped me in my day-to-day practice.'” When I read the neurology section, the headache, the multiple sclerosis, the different type of migraines, what to give for this one, not to give for that, that’s a subject we deal with in our office almost every single day. And at the same time, as an internist, you probably do not pick a neurology book to read that much. So, I feel that section... really refreshed my memory and prepared me to be a better physician. |
| 43-ABIM | [W]ith the PA that I have here, she and I work closely together.... I think we manage hypertension better since [the exam] and we have these discussions... [I]t was triggered by board prep, for example... for Black patients with diabetes, rather using an ACE inhibitor, to use calcium blocker plus diuretic for hypertension, so that was new information for me. I always used ACE inhibitors for everybody. So that kind of gets triggered and gets continued... |
| 44-ABIM | [S]tuff that centered on whether or not people required actual surgery either for diverticulosis or for inflammatory bowel disease, ulcerative colitis maybe that stuff I thought was kind of useful--the surgical indications, not necessarily the indications for other types of treatment. |
| 45-ABIM | There are new medications and guidelines in diabetes now than when I originally trained in internal medicine. That was an important area of learning. |
| 49-ABIM | I would say [there were]... two or three of those moments... where I could literally say, "Oh wow, this is completely new". I remember... one of them was completely opposite of what we learned, where new data had come out that, “You should not do that anymore and should do it now this way”. I think it was with HIV medications... where, you know, "This is not anymore the case, this is now the case" ... [It was] an eye-opener for all of us... |
| 51-ABIM | I could go down every book [from the board review course]. Every book I could – from dermatology, thinking of different rashes and stuff and, “oh yeah, I should – you know what, I should do that better, I should know that better.” Cardiology -- every single book, there was plenty there that added to my knowledge base and was pertinent to what I do every day and enhanced my understanding, I could go through every single book…. [E]ndocrinology, refreshing my memory on all the thyroid disorders and thyroid nodules and how to manage them, there was – there was plenty there. |
| **VII. Updated Approach to Testing** | |
| 2-ABFM | [For learning about] infectious diseases [studying is] very good.  Stuff like screening for tuberculosis, how to read TB skin test which has changed since I was in residency, using QuantiFERON gold and then also not giving like a set diameter of to say it's positive or not. |
| 30-ABFM | [T]here were some newer tests that have become available that… I’ve been trying to implement a little bit more... The stepwise approaches to a lot of chronic conditions, to include diabetes and COPD and CHF and stroke, was revamped a little bit… Those types of things are what have changed pretty significantly in the office... |
| 47-ABIM | I actually had a case - I don’t deal with anorexia a lot, but they gave one or two of those in the course, and it so happened, I had a patient come in who had clearly had just lost a lot of weight. And I never would have checked her phosphorus level, because… that was one of the questions I went over [while studying], so, it was normal, but I knew to do it, so that was nice. |
| 47-ABIM | H pylori testing is something that I knew about, but can’t say I’ve done a whole bunch of.... I’ve actually started doing a lot more of that... which I can’t say I had ordered before I took the course… I don’t think it would be like, the person would be dead, but, it would be something that would just get figured out sooner, rather than later. |
| 63-ABIM | [D]ifferential [diagnosis] on the rheumatologic side, I… sometimes use tests to drive what [I] think is going on [with a patient]… [T]his helped me… [P]utting the tests in a different order… more deliberate, as opposed to sometimes… being somewhat random…. |
| **VIII. Reduced Unnecessary Testing** | |
| 7-ABFM | [O]ne of the things I learned when I was studying is... I practice a lot of defensive medicine. Like, you do it because, let's say, the patient wants to, but it's not really clinically appropriate or it's not according to the guidelines. So now, I learned to maybe talk to patients more, spend more time instead of just ordering what they want because they want it, but [instead] ordering it because it's appropriate or it's up to date in terms of guideline recommendations... Let's say I have a 78 year old patient who wants a colonoscopy. The guideline says, “After 75 years old, especially if they have a lot of comorbidities, you don't recommend doing colon cancer screening anymore.” And before, I used to just order it and do what the patient wants, but I now talk to them more about the risks, the complications, rather than just ordering it. |
| 9-ABFM | I... have rethought looking at microalbumins for people that are already are on ACE inhibitors as probably not a great use of resources. |
| 15-ABFM | … [K]nowing when to do a CT of the abdomen, you know, who to do on-screening chest CTs for lung cancer, and when. And then when is a PET scan useful, when is it not? Those kinds of things, and those sorts of diagnostic tools--You know, we tend to, I think, overuse those tools, and I was able to use them a little less… [M]ost of that overuse is rooted in lack of confidence about other diagnostic skills… I think I was able to move that needle a little further in the direction of doing less… without comprising the patient care, you know… |
| 16-ABFM | I've been able to trim down my thyroid work up… I used to, kind of, just order a battery of tests, and now I [am] able to trim that down based on my suspicion of “hyper-“ versus “hypo-“. |
| 19-ABFM | [E]verybody thinks you need a pap smear once a year but [in the review course] they were talking about, you just need them every three to five years... |
| 19-ABFM | [T]here was a headache lecture that talked about cutting down on MRIs, and so I don’t probably jump to an MRI… [Before] I would just jump to MRIs pretty quick, and I don’t do that as much anymore. |
| 21-ABFM | I would go back to some of the hypertensive and lipid management guidelines, how often I test people’s cholesterol now. I think I’ve decreased how often I test them. |
| 35-ABIM | [I]f I know the colonoscopy screening guidelines, then I know that seniors over 75 really shouldn’t be getting screening, and I also know now that stool occult blood is just as effective… I'm going to use that to help build my [network’s] authorization platform, and build how we manage colon cancer screening in our network…. I'm required to review authorizations as part of my job, so there is much more heightened awareness now where I can address authorizations that are inappropriate, because I understand the guidelines now much better. |
| 45-ABIM | We [used to] do Paps every year. Now we find out that it's every three, or five years... It's more convenient for the patient, so that impacts patient care. And more cost effective for healthcare. |
| 46-ABIM | [I]t helped me in focusing more on what to order, instead of just ordering a whole battery of test for certain conditions… [B]efore, we would see, like, this abnormal value, then we would just go order 20 other tests, just to see what we get. But I think in reading for the boards, there [are] a few conditions that I said, “Okay, maybe this is it, and this is what I need to do.” More focused ordering. |
| 47-ABIM | GI, there’s the whole “who needs an upper endoscopy for GERD?” I think a lot more people get them than the evidence supports, so it was nice to review that evidence and be able to say to people, “look, this is simple, I just took a course from an academic and there is no need to do this.”... , like a patient comes in, and they’ve had heartburn for two days, and they say, “who should I go to for an endoscopy?” And I can say to them, “you are not losing weight, you are not a smoker, it’s only been going on two days - we can give you a trial of medicine for four weeks, and if it goes away and doesn’t comes back, we are done” rather than saying, “Yeah, okay, go and get an endoscopy.” |
| 47-ABIM | There are many scenarios where anyone who’s ever had a cardiac problem, ever, whether they’re asymptomatic and running marathons, the surgeons will say, “I need a stress test”. And the answer is, “No, you don’t. They are fine”. So, I think, being able to push back a little bit - I’ve done that since I took the boards. That actually changed how I practice. |
| 53-ABIM | [W]hen I would encounter the patient, the experiential, learning, for example, recommendations for breast cancer or colon cancer screening, or prostate, PSA, some of these disease screening.  On the MKSAP, it kind of was brought to say, “This is the best practice, what we know in the literature, right to this day.”  And then I can go back in my practice and, “Well, you know, you don't need a PSA,” or, “You don't need a mammogram,” and those kind of things. |
| 53-ABIM | [I]t gave me reassurance that I'm doing the right thing.  And then you're carrying on a conversation with a patient, to tell them why not. Because people have an expectation, “I want this, I want hemoglobin A1C every three weeks,” or whatever… [Because] patients, when they see it on the news… they think that that's the best practice standard. And it often is not… [Patients] want to hear – “Doc, tell me what I need to do.” … And the other thing I liked about it, along those lines, was ordering tests…. It was like, “[T]he test is not going to add anything, so you don't need to do a bone marrow biopsy.” Or, “You don't need to order a MRI.”… “It takes 6-8 weeks and then it's going to recover, you don't have to get an x-ray.” |
| **IX. Reduced Unnecessary Referrals** | |
| 8-ABFM | I’m doing fewer referrals, because it occurred to me when I was doing the board review course... that one of the reasons why I got stuck in a lot of specialty questions, is that I don’t really deal with them besides from referring to them... [W]e in family practice now, especially in bigger centers, we tend to refer out..... like rotator cuff tears, for instance. I don’t automatically send to an orthopedic specialist now, because most rotator tears can be managed conservatively. |
| 9-ABFM | [I]n the area of women's health… I had... a little additional comfort, and so have referred less than I would've before. |
| 19-ABFM | [W]hen someone had a rheumatologic disease, before I took that [board review] course, I would just sort of shut down and send them to the rheumatologist. I wouldn’t try to figure out what was going on. Then, after the course, I tried to figure [it] out, and actually ended up treating a lot of people instead of sending them off [to the subspecialist], like with lupus and sarcoidosis and things like that… |
| 34-ABIM | I see a lot of self-pay patients… When they have [mild] rheumatoid arthritis, I really just start methotrexate myself instead of referring out… because... they may not go to the specialist, because of cost. |
| 57-ABIM | Mostly, I would say in the rheumatology disorders, the connective tissue disorders, is where I find the impact coming [most] obviously. Any other place where there are procedures involved, that kind of goes out of our hands, because we have to depend on a specialist. But maybe, [there are] somewhat less referrals if we are really watching for alarming signs and symptoms, and increasing our comfort level in trying to manage how far we are going to go taking care of a patient - "How much time can we wait and watch, instead of just, like, a knee-jerk reaction of referring to a consultant?" |
| 58-ABIM | [Y]ou have more confidence, you have more information. Referrals, the less you know… or are comfortable with, the more you refer. So with better improved knowledge and up-to-date knowledge on topics, you are more confident… [Y]ou are like, “Oh no, I know I can manage this.” So you tend to refer less in those areas, like, “I know the next step here, that means I can go to the next step”… [O]verall it's very likely decreased some immediate referrals, some probably totally, and some a bit later when after some more work has been done… across the board. |
| 59-ABIM | [S]ome patients come to me, okay, and then they say, "Okay, well, do I need my colonoscopy?" So normally you say, "Well, you need to call GI." But now, if I have that report, I can tell them when the next colonoscopy is going to be due, you know. So I feel this will improve the quality of care that I don't have to send these patients to see GI which is going to cost them more money just to go for a consultation. They may not need anything done. |
| **X. Increased Appropriate Referrals** | |
| 32-ABIM | [A subspecialty section of the board review course] that used to be my bread and butter 12 years ago.... was like Chinese to me and I didn’t get anything right.... my take-home message from that was... how quickly you become uneducated in things that you don’t do... [I]t did give me pause that it’s important to know... that maybe you should pull the trigger for specialty consults sooner on some things. |
| **XI. Communication with Other Healthcare Providers** | |
| 38-ABIM | I feel more confident in my own knowledge. I don’t have to use the specialist just to back up my diagnosis…. I can speak…more accurately, I think, as I hand off a patient, and tell them what I’m concerned about. I don’t have to wait for the specialist to… start from square one. They know more about where I’m coming from, as I send the patient. |
| 42-ABIM | [H]ere in the office, my partner... we frequently do a 2-minute chat about this condition or that condition... And he's... grandfathered in internal medicine... so he doesn’t have to take the exam anymore. So, I actually find myself enjoying giving him what the board currently thinks about this and that, and he listens very attentively to that. And it comes also when I round with the hospitalist over the weekend, we sit initially for about 40 minutes in the morning and we distribute the patients, but we also discuss them briefly. If any of them have a challenging case, he might bring it up and say, “What do you think, guys, is there anything you see that I'm doing or not doing, or where to go next?” And that was also an area where I found myself answering them much more frequently than before, because I had more refreshed information. |
| 45-ABIM | I would say [my] rheumatology work up is much more comprehensive now. |
| 47-ABIM | I think when you appreciate all the different avenues of [cancer] therapy there are now, whereas... 20 years ago... it was like, you get lung cancer, “here is your bucket of potion, good luck”. Now, it’s, “let’s talk about the molecular genetics, and let’s understand where in the cells dividing we now have targeted therapies for”. And figuring out which combination of these things to use. It’s a lot more complicated than it was 20 years ago. I think, to be a practicing internist, just knowing what your subspecialty colleagues are doing is helpful. It’s not like the big black box anymore. I think it’s good for us as a community of physicians to have some knowledge of what’s going on out there. |
| 53-ABIM | I [had] a case of a patient who had some neck mass or whatever.  And then I was studying for the boards… So I had a dialogue, it was really triggered by me and my preparation.... Let me get an opinion from the ENT guy, who's board certified: “What would your board say to this? Is what you do practice, is it in line with what I'm… learning in my preparation for taking this board?” |
| 60-ABIM | [E]ven having conversations with my colleagues, it’s quite funny because every time during the office meeting, something clinical comes up, they all look at me like, “you took the board, you know the best”, so it's... "No pressure!" (laughing) Starting from when to start the prophylaxis for Lyme disease, how many hours and for how long?... think recent study boosted my knowledge significantly. That’s – and as I said, I try to stay up to date anyway, but I think it’s -- sort of massive exposure did help, but it was sort of a systematic approach I think, because as I said, I went through all the topics. |
| **XII. Communication with Patients** | |
| 12-ABFM | I’ve mentioned… patient education and specifically with regards to dementia, I made a little hand out on dementia information… [T]here was also… part of the review on statistics and sensitivity, and I got all that clear in my head, so I'm able to talk to patients about that. |
| 13-ABFM | Some of the public health [content]… like the “stop smoking” phone bank… that I probably didn’t realize were there to help, offering other things to my patients…. I was able to find more written material for patient handouts… in terms of educational-type things…. |
| 42-ABIM | [I]n neurology in particular, where probably you're going to refer the person anyway, [the patient] needs to be seeing a neurologist, but I think now, I can -- because of that [studying], [I'm] not necessarily going to delay the referral, but I can explain it to my patient a little bit better about what I'm doing, why am I doing this, why it would go in this direction, not that direction. |
| 44-ABIM | I thought some of the EKG stuff was a nice refresher and I thought that some of the review in cardiology of valvular heart disease… I got a lot out of… [A]ctually having a working knowledge of the criteria for... what goes to surgery, being able to... run through that stuff with your patients after they get evaluations as to why these decisions are made. |
| 47-ABIM | It just gives you confidence you're doing the right thing, and that you could tell the patient about it… “This is the right thing to do”… I would say, “You know, I just read about this on my board exam, and I just—“… Especially if it was, like, something that I don't see all the time... And that was pretty powerful. Otherwise, if I weren't [studying at] that time, I don't think I would have that conversation. |
| 50-ABIM | I suppose that [someone looking at my practice] would see [improvement in] my discussions with patients about why I want them to do things even if they don’t do it, with regard to statins. Or… why I'm weighing risks or benefits for specific guidelines--being able to verbalize what I’m thinking better, more than actually changing what I’m doing... |
| 55-ABIM | [S]ometimes [patients] say, “Well, I heard this on news, I heard that--that’s not what you were saying.” I said, “Well, I hear what you were saying in your news there, and [that is] unfiltered information. But, I just got through the review course, I just took my boards, I just passed my boards, and that area was not discussed…” And then they go, “Oh, okay…” |
| **XIII. Expanded Scope of Practice** | |
| 39-ABIM | I think since I’m diagnosing [patients] down the pathway a little bit further, I’m starting them on treatment a little bit earlier... [S]tarting the treatment without waiting for the specialist... [patients] were definitely much… happier because they can feel better [faster]. |
| 47-ABIM | Just being more knowledgeable, it should help you to do more and refer less, or be more comfortable with stuff. So, I think like, in rheumatology, for example, I treat probably five people that have had temporal arteritis, that have been to a rheumatologist. I suspect, next time, I’ll probably just do it myself, because, now, I’ve seen that there is no magic to this, and I know what they do, and I spent 20 minutes learning about it. So, if that were to come up, I’d do it myself. |
| 57-ABIM | I could reduce a significant amount of financial burden that a patient would have... because the payment [for seeing me] in the community health center for them is… significantly less compared to a visit to a specialist. So I guess I could say I could act as a specialist - I could be a representative for them down here... [H]aving this kind of underserved patient population takes our learning at a different level, because… we can help them better. |

aThese quotes are in physicians’ own words. Although reviewed by physicians (LL & LP), we cannot guarantee that the quotes are accurate or up-to-date in terms of standard of care. Additionally, themes are not mutually exclusive, and multiple themes could apply to each quote.
